# Supplementary material
Source: PubMed Central journal article supplement (PMC5696007)
Supplement: NIHMS887080-supplement-Supp_info.pdf [file NIHMS887080-supplement-Supp_info.pdf]

## **DESCRIPTION OF SUPPORTING INFORMATION**

**Supplemental Table 1.** Major cardiovascular disease complication definitions from Northwestern University Enterprise Data Warehouse (NMEDW) and Organ Procurement and Transplantation Network (OPTN) databases

**Supplemental Table 2.** Potential Preoperative and Perioperative CVD risk factors analyzed from the Organ Procurement and Transplantation Network (OPTN) and the Northwestern Medicine Enterprise Data Warehouse (NMEDW)

**Supplemental Table 3.** Demographic and Clinical Characteristics of First Liver Transplant Recipients at Northwestern Medicine Compared to the National Sample (OPTN, 2002-2011)

**Supplemental Table 1. Major cardiovascular disease complication definitions from Northwestern University Enterprise Data Warehouse (NMEDW) and Organ Procurement and Transplantation Network (OPTN) databases**

| <b>Major CVD Complication</b> | <b>International Classification of Diseases (ICD-9) or Common Procedural Terminology (CPT) codes*^</b>                                                                                                                                                                                                                                                                                                                   |
|-------------------------------|--------------------------------------------------------------------------------------------------------------------------------------------------------------------------------------------------------------------------------------------------------------------------------------------------------------------------------------------------------------------------------------------------------------------------|
| Myocardial infarction         | 410.xx                                                                                                                                                                                                                                                                                                                                                                                                                   |
| Revascularization**           | 36.0x, 36.1x, 36.2<br>92982, 92984, 92995, 92996, 92980, 92981, G8963, G8964, 4561F, 92928, 92929, 92933, 92934, 92937, 92938, 92941, 92943, 92944, C1027, C1060, C1173, C1312, C1313, C1314, C1334, C1375, C5030, C5031, C5032, C5033, C5034, C5035, C5036, C5037, C5038, C5041, C5042, C5043, C5044, C5045, C5046, C5047, C5048, C8830, C9600-C9608, G0290, G0291, S2211; 00566, 00567, 33510 to 33523, 33533 to 33536 |
| Heart failure                 | 398.91, 422, 428, 402.x1, 404.x1, 404.x3                                                                                                                                                                                                                                                                                                                                                                                 |
| Pulmonary embolism            | 415.1x                                                                                                                                                                                                                                                                                                                                                                                                                   |
| Atrial fibrillation           | 427.31x                                                                                                                                                                                                                                                                                                                                                                                                                  |
| Cardiac arrest                | 427.5                                                                                                                                                                                                                                                                                                                                                                                                                    |
| Stroke or TIA                 | 430, 431, 432, 433.x1, 434.x1, 435.x, 997.02                                                                                                                                                                                                                                                                                                                                                                             |

Abbreviations: CVD, cardiovascular disease; TIA, transient ischemic attack

\*Major CVD events or procedures were defined by a discharge ICD-9 or CPT code within the first 3 diagnosis positions

^All codes combined with "OR" term

\*\*Revascularization was defined as percutaneous coronary intervention (PCI) or stent placement or coronary artery bypass grafting

**Supplemental Table 2. Potential Preoperative and Perioperative CVD risk factors analyzed from the Organ Procurement and Transplantation Network (OPTN) and the Northwestern Medicine Enterprise Data Warehouse (NMEDW)**

| Covariate name                                                 | NMEDW              |                                                       | OPTN variables*                                                   | N (%) missing |
|----------------------------------------------------------------|--------------------|-------------------------------------------------------|-------------------------------------------------------------------|---------------|
|                                                                | Procedure Codes*   | Diagnosis codes*                                      |                                                                   |               |
| Recipient Age**                                                |                    | Validated in NMEDW                                    | AGE                                                               | 0 (0)         |
| Recipient Sex**                                                |                    | Validated in NMEDW                                    | GENDER                                                            | 0 (0)         |
| Recipient Race & ethnicity**                                   |                    | Validated in NMEDW                                    | ETHNICITY and ETHCAT                                              | 0 (0)         |
| Education level**                                              |                    | Validated in NMEDW                                    | EDUCATION                                                         | 175 (17.1)    |
| Employment status at transpl**                                 |                    | Validated in NMEDW                                    | WORK_INCOME_TRR                                                   | 10 (0.98)     |
| Marital status**                                               |                    | NMEDW code                                            |                                                                   | 6 (0.59)      |
| Primary Payor**                                                |                    | NMEDW code                                            |                                                                   | 3 (0.29)      |
| Primary cause of Liver Disease**                               |                    | Validated in NMEDW                                    | DIAG<br>DGN_TCR                                                   | 0 (0)         |
| Functional status at transplant**                              |                    |                                                       | FUNC_STAT TRR<br>LIFE_SUP_TRR<br>OTH_LIFE_SUP_TRR<br>OTH_VENT_TRR | 45 (4.4)      |
| Hospitalization status at transplant**                         |                    | NMEDW code                                            | Validated with<br>MED_CON_TRR                                     | 0 (0)         |
| Calculated MELD score**                                        |                    | Validated in NMEDW                                    | Calculated from <i>Liver Data STAR file</i>                       | 0 (0)         |
| Days on waiting list**                                         |                    |                                                       | DAYSWAIT_CHRON                                                    | 0 (0)         |
| Simultaneous liver-kidney transplant**                         | Validated in NMEDW |                                                       | TXKID                                                             | 0 (0)         |
| <b>Recipient Complications of ESLD</b>                         |                    |                                                       |                                                                   |               |
| Ascites                                                        |                    | 789.5, 789.51, 789.59                                 | ASCITES_TX or FINAL_ASCITES                                       | 0 (0)         |
| Spontaneous bacterial peritonitis (SBP)**                      |                    | 567.23                                                | BACT_PERIT_TRR                                                    | 0 (0)         |
| Hepatic encephalopathy**                                       |                    | 572.2                                                 | ENCEPH_TCR or ENCEPH_TRR_OLD or ENCEPH_TX or FINAL_ENCEPH         | 0 (0)         |
| Portal Vein Thrombosis**                                       |                    | 452                                                   | PORTAL_VEIN_TCR or PORTAL_VEIN_TRR                                | 0 (0)         |
| Transjugular intrahepatic portosystemic shunt (TIPS) placement | CPT: 37182, 37183  | 39.1                                                  | TIPSS_TCR or TIPSS_TRR                                            | 0 (0)         |
| Bleeding esophageal or gastric varices                         |                    | 46.0, 456.1, 456.2, 456.20, 456.21, 456.8             | VARIC_BLEED_TCR                                                   | 0 (0)         |
| Hepatocellular Carcinoma**                                     |                    | v10.07, 155, 155.1, 155.2, 156.1, 156.9, 235.3, 230.8 | HCC_DIAG                                                          | 0 (0)         |
| Hepatopulmonary syndrome**                                     |                    | 573.5                                                 |                                                                   | 0 (0)         |
| Hepatorenal syndrome**                                         |                    | 572.4                                                 |                                                                   | 0 (0)         |
| Hyponatremia                                                   |                    | Validated in NMEDW                                    | sodium < 135 mg/dL                                                | 74 (7.2)      |

**Supplemental Table 2 continued**

| Covariate name                                   | NMEDW                                                                                                                                                                                                                                                                                                                                                                                                                          |                                                                                      | OPTN variables*      | N (%) missing |
|--------------------------------------------------|--------------------------------------------------------------------------------------------------------------------------------------------------------------------------------------------------------------------------------------------------------------------------------------------------------------------------------------------------------------------------------------------------------------------------------|--------------------------------------------------------------------------------------|----------------------|---------------|
|                                                  | Procedure Codes*                                                                                                                                                                                                                                                                                                                                                                                                               | Diagnosis codes*                                                                     |                      |               |
| <b>Recipient Comorbid CVD Conditions</b>         |                                                                                                                                                                                                                                                                                                                                                                                                                                |                                                                                      |                      |               |
| Hypertension**                                   |                                                                                                                                                                                                                                                                                                                                                                                                                                | 401-405                                                                              | DRUGTRT_HYP          | 0 (0)         |
| Hyperlipidemia                                   |                                                                                                                                                                                                                                                                                                                                                                                                                                | 272.0, 272.1, 272.3                                                                  |                      | 0 (0)         |
| Stroke or TIA**                                  |                                                                                                                                                                                                                                                                                                                                                                                                                                | 430, 431, 432, 433.x1, 434.x1, 997.02, 435.x, V12.54                                 | CEREB_VASC           | 0 (0)         |
| Any cardiac dysrhythmia or conduction disorder** | ICD9-CM: 37.8x, 37.7x, 37.6x, 37.9x, 89.49<br><br>CPT: 33241, 33249, 33233, 33240, 93741, 93742, 93743-26, 93744-26                                                                                                                                                                                                                                                                                                            | 426.0, 427.0-427.4, V12.53                                                           |                      | 0 (0)         |
| Atrial fibrillation**                            |                                                                                                                                                                                                                                                                                                                                                                                                                                | 427.31x                                                                              |                      | 0 (0)         |
| Peripheral vascular disease                      |                                                                                                                                                                                                                                                                                                                                                                                                                                | 440.0-440.9                                                                          | PERIP_VASC           | 0 (0)         |
| Congestive heart failure**                       |                                                                                                                                                                                                                                                                                                                                                                                                                                | 398.91, 422, 428, 402.x1, 404.x1, 404.x3, V42.1                                      |                      | 0 (0)         |
| Ischemic heart disease**                         | ICD9-CM: 36.0x, 36.1x, 36.2<br><br>CPT: 92982, 92984, 92995, 92996, 92980, 92981, G8963, G8964, 4561F, 92928, 92929, 92933, 92934, 92937, 92938, 92941, 92943, 92944, C1027, C1060, C1173, C1312, C1313, C1314, C1334, C1375, C5030, C5031, C5032, C5033, C5034, C5035, C5036, C5037, C5038, C5041, C5042, C5043, C5044, C5045, C5046, C5047, C5048, C8830, C9600-C9608, G0290, G0291, S2211 OR 33510 to 33523, 33533 to 33536 | 410.x, 411.x, 412, 413.x, 414.0x, 414.2, 414.3, 414.8, 414.9, V45.82, V45.09, V45.81 | ANGINA or ANGINA_OLD | 0 (0)         |

**Supplemental Table 2 continued**

| Covariate name          | NMEDW                                                                                                                                                                                                                                                                                                                                                                                                 |                  | OPTN variables* | N (%) missing |
|-------------------------|-------------------------------------------------------------------------------------------------------------------------------------------------------------------------------------------------------------------------------------------------------------------------------------------------------------------------------------------------------------------------------------------------------|------------------|-----------------|---------------|
|                         | Procedure Codes*                                                                                                                                                                                                                                                                                                                                                                                      | Diagnosis codes* |                 |               |
| Myocardial infarction** |                                                                                                                                                                                                                                                                                                                                                                                                       | 410.x, 412       |                 | 0 (0)         |
| Prior revascularization | <u>ICD9-CM</u> : 36.0x, 36.2<br><br><u>CPT</u> : 92982, 92984, 92995, 92996, 92980, 92981, G8963, G8964, 4561F, 92928, 92929, 92933, 92934, 92937, 92938, 92941, 92943, 92944, C1027, C1060, C1173, C1312, C1313, C1314, C1334, C1375, C5030, C5031, C5032, C5033, C5034, C5035, C5036, C5037, C5038, C5041, C5042, C5043, C5044, C5045, C5046, C5047, C5048, C8830, C9600-C9608, G0290, G0291, S2211 | V45.82, V45.09   |                 | 0 (0)         |
| Prior CABG              | <u>ICD9-CM</u> : 36.1x<br><br><u>CPT</u> : 33510 to 33523, 33533 to 33536                                                                                                                                                                                                                                                                                                                             | V45.81           |                 | 0 (0)         |

**Supplemental Table 2 continued**

| Covariate name                             | NMEDW            |                                                                                     | OPTN variables*                                  | N (%) missing |
|--------------------------------------------|------------------|-------------------------------------------------------------------------------------|--------------------------------------------------|---------------|
|                                            | Procedure Codes* | Diagnosis codes*                                                                    |                                                  |               |
| <b>Other Recipient Comorbid Conditions</b> |                  |                                                                                     |                                                  |               |
| Any Venous thromboembolism**               |                  | 453.4x, 453.7x, 453.5x, 453.8x, 453.9, 415.11, 415.13, 415.19, 416.2, V12.55 V12.51 | PULM_EMBOL                                       | 0 (0)         |
| Deep venous thrombosis                     |                  | 453.4x, 453.5x, 453.8x, 453.7x, 453.9x, V12.51                                      |                                                  | 0 (0)         |
| Acute or chronic Pulmonary embolism**      |                  | 416.2, 415.11, 415.13, 415.19, V12.55                                               | PULM_EMBOL                                       | 0 (0)         |
| Diabetes**                                 |                  | 250.xx, v12.29, v45.85                                                              | DIAB                                             | 0 (0)         |
| Pulmonary hypertension**                   |                  | 416.0, 416.8                                                                        |                                                  | 0 (0)         |
| COPD/Asthma                                |                  | 490 , 491.x, 492.x, 494.0, 494.1, 496, 518.1, 518.2, 493.xx                         | DRUGTRT_COPD                                     | 0 (0)         |
| Obstructive sleep apnea                    |                  | 327.23, 327.26, 327.27, 780.53                                                      |                                                  | 0 (0)         |
| Respiratory failure on a ventilator**      |                  | Validated in NMEDW                                                                  | LIFE_SUP_TRR or ON_VENT_TRR or OTH_LIFE_SUP_TRR  | 0 (0)         |
| Chronic kidney disease**                   |                  | V13.03, 585.x                                                                       |                                                  | 0 (0)         |
| Renal failure requiring RRT**              |                  | Validated in NMEDW                                                                  | DIAL_TCR or DIAL_TX or FINAL_DIALYSIS_PRIOR_WEEK | 0 (0)         |
| Obesity                                    |                  | 278.00, 278.01, 278.02, 278.03                                                      | BMI_CALC ≥ 30 k/m <sup>2</sup> from BMI_TCR      | 0 (0)         |
| Recipient body mass index                  |                  | Validated in NMEDW                                                                  | BMI_TCR                                          | 131 (12.8)    |
| Peptic ulcer disease                       |                  | V12.71, 530.21, 531.xx, 532.xx, 533,xx                                              |                                                  | 0 (0)         |
| <b>Substance Use History</b>               |                  |                                                                                     |                                                  |               |
| Recipient tobacco use**                    |                  | 305.1, v15.82 and natural language processing**                                     |                                                  | 0 (0)         |
| Alcohol dependence                         |                  | V11.3, 291.x, 303.xx, 305.xx, 571.x                                                 |                                                  | 0 (0)         |
| Cocaine use                                |                  | 304.2x                                                                              |                                                  | 0 (0)         |
| Other drug use                             |                  | 304.0x, 304.1x, 304.3x, 304.4x, 304.5x, 304.6x, 304.7                               |                                                  | 0 (0)         |
| Family history of cardiovascular disease   |                  | v17.1, v17.3, v17.4, v17.41, v17.49                                                 |                                                  | 0 (0)         |

**Supplemental Table 2 continued**

| Covariate name                                        | NMEDW                                                                                                                                                                                                                                                                                                                                                                                                              |                  | OPTN variables* | N (%) missing |
|-------------------------------------------------------|--------------------------------------------------------------------------------------------------------------------------------------------------------------------------------------------------------------------------------------------------------------------------------------------------------------------------------------------------------------------------------------------------------------------|------------------|-----------------|---------------|
|                                                       | Procedure Codes*                                                                                                                                                                                                                                                                                                                                                                                                   | Diagnosis codes* |                 |               |
| <b>Medication usage within 48 hours of transplant</b> |                                                                                                                                                                                                                                                                                                                                                                                                                    |                  |                 |               |
| Antihypertensive                                      | INCLUDES: Thiazides: Chlorthalidone indapimide; Renin blocker: Aliskiren; Calcium-channel blockers (see below); ACE inhibitors; ARBs (EXCLUDES: eplerenone, Spironolactone); vasodilator: Hydralazine; Alpha2 agonist                                                                                                                                                                                              |                  |                 | 0 (0)         |
| Calcium Channel Blocker                               | INCLUDES: Verapamil, Diltiazem, Amlodipine (Norvasc), Isradipine (DynaCirc, Prescal), Felodipine (Plendil), Nicardipine (Cardene, Carden SR), Nifedipine (Procardia, Adalat) Nimodipine (Nimotop)                                                                                                                                                                                                                  |                  |                 | 0 (0)         |
| Beta Blocker                                          | INCLUDES those possibly given for variceal bleeding prophylaxis                                                                                                                                                                                                                                                                                                                                                    |                  |                 | 0 (0)         |
| Diuretic                                              | INCLUDES: Loop diuretics: bumetanide, ethacrynic acid, furosemide, torsemide; Thiazide-like diuretics: metolazone; Potassium-sparing diuretics: spironolactone                                                                                                                                                                                                                                                     |                  |                 | 0 (0)         |
| Statin                                                | All types                                                                                                                                                                                                                                                                                                                                                                                                          |                  |                 | 0 (0)         |
| Aspirin                                               | All doses                                                                                                                                                                                                                                                                                                                                                                                                          |                  |                 | 0 (0)         |
| Antiarrhythmic                                        | INCLUDES:<br>Class 1: sodium channel (Disopyramide, Quinidine, Procainamide, Lidocaine, Mexiletine, Tocainide, Moricizine. Flecainide, Propafenone<br>Class 2: beta blockers<br>Class 3: potassium channel (bretylum, amiodarone, ibutilide sotalol, dofetilide, dronedarone<br>Class 4: diltiazem, verapamil                                                                                                      |                  |                 | 0 (0)         |
| Pulmonary vasodilator                                 | All doses                                                                                                                                                                                                                                                                                                                                                                                                          |                  |                 | 0 (0)         |
| Insulin                                               | All doses                                                                                                                                                                                                                                                                                                                                                                                                          |                  |                 | 0 (0)         |
| Antiplatelet                                          | INCLUDES: ASA, Plavix                                                                                                                                                                                                                                                                                                                                                                                              |                  |                 | 0 (0)         |
| Other anticoagulant                                   | (EXCLUDES prophylactic doses)<br>INCLUDES: low molecular weight heparins: bemiparin, certoparin, dalteparin, enoxaparin, nadroparin, parnaparin, reviparin, tinzaparin<br>therapeutic unfractionated heparin: drip or subcutaneous dose > 5000 units TID; Coumadin/warfarin; Factor Xa: Fondaparinux, Idraparinux, rivaroxaban, apixaban; direct thrombin, hirudin, lepirudin, bivalirudin; argatroban, dabigatran |                  |                 | 0 (0)         |
| Quinolone                                             | INCLUDES: Ciprofloxacin, norfloxacin, ofloxacin, levofloxacin                                                                                                                                                                                                                                                                                                                                                      |                  |                 | 0 (0)         |

**Supplemental Table 2 continued**

| Covariate name                         | NMEDW                                                                                                                                                                                                                                               |                  | OPTN variables* | N (%) missing |
|----------------------------------------|-----------------------------------------------------------------------------------------------------------------------------------------------------------------------------------------------------------------------------------------------------|------------------|-----------------|---------------|
|                                        | Procedure Codes*                                                                                                                                                                                                                                    | Diagnosis codes* |                 |               |
| Vasopressor                            | within 24 hours of transplant and > 1 hour in duration administered<br>INCLUDES: dopamine, dobutamine, epinephrine, norepinephrine, vasopressin, phenylephrine, desmopressin (DDAVP), octreotide, terlipressin, midodrine, milrinone, neosynephrine |                  |                 | 0 (0)         |
| Steroid                                | INCLUDES: hydrocortisone, prednisone, prednisolone, dexamethasone, methylprednisolone, fludrocortisone, aldosterone                                                                                                                                 |                  |                 | 0 (0)         |
| <b>Vital signs at transplant</b>       |                                                                                                                                                                                                                                                     |                  |                 |               |
| Height                                 | NMEDW code, Average of 3 values within 24 hours of transplant                                                                                                                                                                                       |                  |                 | 126 (12.3)    |
| Weight                                 |                                                                                                                                                                                                                                                     |                  |                 | 117 (11.4)    |
| Systolic blood pressure                |                                                                                                                                                                                                                                                     |                  |                 | 136 (13.3)    |
| Diastolic blood pressure               |                                                                                                                                                                                                                                                     |                  |                 | 136 (13.3)    |
| Heart rate                             |                                                                                                                                                                                                                                                     |                  |                 | 136 (13.3)    |
| Glascow coma score                     | Minimum recorded Glascow coma score within 24 hours of transplant                                                                                                                                                                                   |                  |                 | 822 (80.3)    |
| <b>Laboratory values at transplant</b> |                                                                                                                                                                                                                                                     |                  |                 |               |
| Arterial PO2                           | Most recent value within 72 hours of transplant                                                                                                                                                                                                     |                  |                 | 503 (49.1)    |
| Arterial pH                            |                                                                                                                                                                                                                                                     |                  |                 | 503 (49.1)    |
| Lactic Acid                            |                                                                                                                                                                                                                                                     |                  |                 | 503 (49.1)    |
| ALT                                    |                                                                                                                                                                                                                                                     |                  |                 | 20 (2.0)      |
| AST                                    |                                                                                                                                                                                                                                                     |                  |                 | 99 (10.0)     |
| Albumin                                |                                                                                                                                                                                                                                                     |                  |                 | 0 (0)         |
| Alkaline Phosphatase                   |                                                                                                                                                                                                                                                     |                  |                 | 106 (10.4)    |
| Bicarbonate                            |                                                                                                                                                                                                                                                     |                  |                 | 97 (9.5)      |
| Glucose_Level                          |                                                                                                                                                                                                                                                     |                  |                 | 97 (9.5)      |
| Hemoglobin                             |                                                                                                                                                                                                                                                     |                  |                 | 87 (8.5)      |
| INR                                    |                                                                                                                                                                                                                                                     |                  |                 | 194 (18.9)    |
| Platelet Count                         |                                                                                                                                                                                                                                                     |                  |                 | 89 (8.7)      |
| Sodium                                 |                                                                                                                                                                                                                                                     |                  |                 | 74 (7.2)      |
| Total Bilirubin                        |                                                                                                                                                                                                                                                     |                  |                 | 0 (0)         |
| White Cell Count                       |                                                                                                                                                                                                                                                     |                  |                 | 85 (8.3)      |
| eGFR_African_Am                        |                                                                                                                                                                                                                                                     |                  |                 | 252 (24.6)    |
| eGFR_NonAfr_Am                         |                                                                                                                                                                                                                                                     |                  |                 | 252 (24.6)    |
| Creatinine**                           |                                                                                                                                                                                                                                                     |                  |                 | 7 (0.68)      |
| LDL**                                  | Most recent value within 1 year of transplant                                                                                                                                                                                                       |                  |                 | 400 (39.0)    |
| Non-HDL Cholesterol                    |                                                                                                                                                                                                                                                     |                  |                 | 806 (78.7)    |
| Total Cholesterol**                    |                                                                                                                                                                                                                                                     |                  |                 | 306 (37.7)    |
| Triglycerides**                        |                                                                                                                                                                                                                                                     |                  |                 | 370 (36.1)    |
| HDL                                    |                                                                                                                                                                                                                                                     |                  |                 | 391 (38.2)    |
| Hemoglobin A1C                         | Most recent value within 90 days of transplant                                                                                                                                                                                                      |                  |                 | 806 (78.7)    |
| Ferritin                               |                                                                                                                                                                                                                                                     |                  |                 | 1000 (97.7)   |
| Troponin I                             |                                                                                                                                                                                                                                                     |                  |                 | 1020 (99.6)   |
| C Reactive Protein                     |                                                                                                                                                                                                                                                     |                  |                 | 1021 (99.7)   |
| CKMB                                   |                                                                                                                                                                                                                                                     |                  |                 | 1021 (99.7)   |
| BNP                                    |                                                                                                                                                                                                                                                     |                  |                 | 1023 (99.9)   |



**Supplemental Table 2 continued**

| Covariate name                                                                                                                                           | NMEDW                                         |                  | OPTN variables* | N (%) missing                                                          |
|----------------------------------------------------------------------------------------------------------------------------------------------------------|-----------------------------------------------|------------------|-----------------|------------------------------------------------------------------------|
|                                                                                                                                                          | Procedure Codes*                              | Diagnosis codes* |                 |                                                                        |
| <b>Pretransplant cardiac testing</b>                                                                                                                     |                                               |                  |                 |                                                                        |
| ECG performed<br>QTc interval<br>Ventricular rate**<br>QRS duration, mean**                                                                              | Most recent value within 1 year of transplant |                  |                 | 368 (35.9)<br>368 (35.9)<br>368 (35.9)<br>368 (35.9)                   |
| Echo performed<br>Ejection fraction<br>Diastolic dysfunction/grade**<br>Tricuspid regurg/severity**<br>Septal flattening                                 | Most recent value within 1 year of transplant |                  |                 | 231 (22.6)<br>231 (22.6)<br>200 (19.5)<br>200 (19.5)<br>231 (22.6)     |
| Stress test performed & type<br>Stress test result<br>Normal<br>Abnormal<br>Maximal predicted heart rate                                                 | Most recent value within 1 year of transplant |                  |                 | 486 (47.5)<br>486 (47.5)<br><br><br>486 (47.5)                         |
| Left heart catheterization performed**<br>Normal<br>Left main not intervened<br>Any other CAD not intervened<br>Intervened on CAD                        | Most recent value within 1 year of transplant |                  |                 | 575 (56.2)<br><br>575 (56.2)<br>575 (56.2)<br>575 (56.2)<br>575 (56.2) |
| Right heart catheterization performed**<br>Pulmonary capillary wedge pressure<br>Mean pulmonary arterial pressure<br>Portopulmonary hypertension present | Most recent value within 1 year of transplant |                  |                 | 760 (74.2)<br><br>760 (74.2)<br><br>760 (74.2)                         |
| CT angiography performed                                                                                                                                 | Most recent value within 1 year of transplant |                  |                 | 984 (96.0)                                                             |

**Supplemental Table 2 continued**

| Covariate name                   | NMEDW            |                  | OPTN variables*           | N (%) missing |
|----------------------------------|------------------|------------------|---------------------------|---------------|
|                                  | Procedure Codes* | Diagnosis codes* |                           |               |
| DonAge**                         |                  |                  | AGE_DON                   | 0 (0)         |
| Sex                              |                  |                  | GENDER_DON                | 0 (0)         |
| Ethnicity                        |                  |                  | ETHCAT_DON                | 0 (0)         |
| Donor Risk Index                 |                  |                  | Calculated variable       | 150 (14.6)    |
| Donor BMI (kg/m <sup>2</sup> )** |                  |                  | BMI_DON_CALC              | 1 (0.09)      |
| Donor Liver Fat                  |                  |                  | MACRO_FAT_LI_DON          | 825 (80.6)    |
| Inotropes at procurement         |                  |                  | INOTROP_AGENTS_DON        | 0 (0)         |
| Antihypertensives                |                  |                  | ANTIHYPE_DON              | 0 (0)         |
| Steroids                         |                  |                  | PT_STEROIDS_DON           | 0 (0)         |
| Thyroid replacement              |                  |                  | PT_T3_DON or<br>PT_T4_DON | 0 (0)         |
| Desmopressin (DDAVP)             |                  |                  | DDAVP_DON                 | 0 (0)         |
| Diabetes                         |                  |                  | HIST_DIABETES_DON         | 0 (0)         |
| Hypertension                     |                  |                  | HIST_HYPERTENS_DON        | 0 (0)         |
| Myocardial Infarction            |                  |                  | HISTORY_MI_DON            | 0 (0)         |
| Malignancy                       |                  |                  | HIST_CANCER_DON           | 0 (0)         |
| Infection at time of transplant  |                  |                  | BLOOD_INF_DON             | 0 (0)         |
| Smoker                           |                  |                  | HIST_CIG_DON              | 0 (0)         |
| Alcohol dependency               |                  |                  | ALCOHOL_HEAVY_DON         | 0 (0)         |
| Cocaine                          |                  |                  | HIST_COCAINE_DON          | 0 (0)         |
| Other drug use                   |                  |                  | HIST_OTH_DRUG_DON         | 0 (0)         |
| Donation after Cardiac Death     |                  |                  | NON_HRT_DON               | 0 (0)         |
| Living Donor                     |                  |                  | DON_TY                    | 0 (0)         |
| CDC high risk donor              |                  |                  | CDC_HIGH_RISK_DONOR       | 0 (0)         |
| Allocation Type                  |                  |                  | ALLOCATION_TY             | 0 (0)         |
| Graft cold ischemia time         |                  |                  | COLD_ISCH                 | 1 (0.09)      |
| Graft warm ischemia time         |                  |                  | WARM_ISCH_TM              | 588 (57.4)    |

**Supplemental Table 2 continued**

| Covariate name                                                                                                                                                                                                                                      | NMEDW                                                                                                                    |                  | OPTN variables* | N (%) missing                                                                                                                                          |
|-----------------------------------------------------------------------------------------------------------------------------------------------------------------------------------------------------------------------------------------------------|--------------------------------------------------------------------------------------------------------------------------|------------------|-----------------|--------------------------------------------------------------------------------------------------------------------------------------------------------|
|                                                                                                                                                                                                                                                     | Procedure Codes*                                                                                                         | Diagnosis codes* |                 |                                                                                                                                                        |
| <b>Perioperative characteristics</b>                                                                                                                                                                                                                |                                                                                                                          |                  |                 |                                                                                                                                                        |
| Transfusion received<br>Platelets**<br>Red blood cells<br>Fresh frozen plasma**<br>Cryoprecipitate**                                                                                                                                                | Analyzed by units given within 48 hours of OR entry time                                                                 |                  |                 | 0 (0)<br>0 (0)<br>0 (0)<br>0 (0)<br>0 (0)                                                                                                              |
| Surgical duration (min)**                                                                                                                                                                                                                           |                                                                                                                          | NMEDW code       |                 | 43 (4.2)                                                                                                                                               |
| ASA class**                                                                                                                                                                                                                                         |                                                                                                                          | NMEDW code       |                 | 417 (40.7)                                                                                                                                             |
| Operative features<br>Biliary anastomosis<br>Hepatic artery anastomosis replaced/accessory artery<br>Portal vein anastomosis<br>Cava anastomosis<br>Venovenous bypass used<br>Wound open at end of case                                             |                                                                                                                          | NMEDW code       |                 | 0 (0)<br>0 (0)<br>0 (0)<br>0 (0)<br>0 (0)<br>0 (0)                                                                                                     |
| Intraoperative TEE<br>Ejection fraction<br>Tricuspid regurgitation<br>Aortic regurgitation<br>Aortic stenosis<br>Mitral regurgitation<br>Pulmonic regurgitation<br>Intraatrial shunt<br>LA thrombus<br>Wall motion abnormality<br>Septal flattening | Valvular disease was graded as present/absent and by severity (trace/mild; mild-moderate; moderate; and moderate-severe) |                  |                 | 869 (84.9)<br>869 (84.9)<br>920 (89.8)<br>869 (84.9)<br>869 (84.9)<br>869 (84.9)<br>869 (84.9)<br>869 (84.9)<br>869 (84.9)<br>869 (84.9)<br>869 (84.9) |
| OR vasopressor required**<br>Dopamine<br>Epinephrine<br>Norepinephrine<br>Vasopressin<br>Octreotide<br>Milrinone<br>DDAVP                                                                                                                           |                                                                                                                          | NMEDW code       |                 | 0 (0)<br>0 (0)<br>0 (0)<br>0 (0)<br>0 (0)<br>0 (0)<br>0 (0)<br>0 (0)                                                                                   |
| Intraop thromboelastogram (TEG) performed<br>Stage I (preanhepatic)<br>Stage II (anhepatic)<br>Stage III (post-reperfusion)                                                                                                                         |                                                                                                                          | NMEDW code       |                 | 658 (64.2)                                                                                                                                             |
| Intraoperative Laboratory values, mean<br>Lowest Arterial pH**<br>Lowest hemoglobin**<br>Lowest hematocrit<br>Peak INR**<br>Peak PT<br>Peak PTT<br>Lowest fibrinogen**<br>Lowest factor V<br>Peak arterial lactate**                                |                                                                                                                          | NMEDW code       |                 | 96 (9.4)<br>97 (9.5)<br>97 (9.5)<br>233 (22.8)<br>233 (22.8)<br>233 (22.8)<br>233 (22.8)<br>998 (97.5)<br>96 (9.4)                                     |

**Supplemental Table 2 continued**

| Covariate name                                  | NMEDW            |                  | OPTN variables*                                | N (%) missing |
|-------------------------------------------------|------------------|------------------|------------------------------------------------|---------------|
|                                                 | Procedure Codes* | Diagnosis codes* |                                                |               |
| Immediate postoperative laboratory values, mean |                  | NMEDW code       |                                                |               |
| Peak arterial lactic acid (lactate)**           |                  |                  |                                                | 105           |
| Peak ALT                                        |                  |                  |                                                | 0 (0)         |
| Peak AST                                        |                  |                  |                                                | 0 (0)         |
| Peak bilirubin**                                |                  |                  |                                                | 0 (0)         |
| Peak alkaline phosphatase                       |                  |                  |                                                | 0 (0)         |
| Peak INR                                        |                  |                  |                                                | 0 (0)         |
| Peak creatinine**                               |                  |                  |                                                | 2 (0.19)      |
| Immediate postoperative Liver Ultrasound        |                  | NMEDW code       |                                                | 102 (10.0)    |
| Main portal vein velocity                       |                  |                  |                                                | 102 (10.0)    |
| Right portal vein velocity                      |                  |                  |                                                | 102 (10.0)    |
| Left portal vein velocity                       |                  |                  |                                                | 102 (10.0)    |
| Main hepatic artery peak systolic velocity      |                  |                  |                                                | 102 (10.0)    |
| Main hepatic artery RI                          |                  |                  |                                                | 102 (10.0)    |
| Right hepatic artery RI                         |                  |                  |                                                | 102 (10.0)    |
| Left hepatic artery RI                          |                  |                  |                                                | 102 (10.0)    |
| Fluid collection seen                           |                  |                  |                                                | 102 (10.0)    |
| Fluid collection size                           |                  |                  |                                                | 102 (10.0)    |
| Biliary ductal dilation                         |                  |                  |                                                | 102 (10.0)    |
| Recipient Immunoprophylaxis**,                  |                  | NMEDW validation | Liver Immuno Discharge and followup STAR files | 0 (0)         |

Abbreviations: ALT, alanine aminotransferase; ASA, American Society of Anesthesiologists ; AST, aspartate aminotransferase; BNP, brain natriuretic peptide; CDC, centers for disease control; CABG, coronary artery bypass grafting; CAD, coronary artery disease; CKMB, creatinine kinase myocardial based; COPD, chronic obstructive pulmonary disease; CPT, common procedural code terminology; CT, computed tomography; DDAVP, desmopressin; DRG, Medicare severity diagnosis-related groups; eGRF, estimated glomerular filtration rate; ESLD, end-stage liver disease; HDL, high density lipoprotein; ICD9, International Classification of Diseases, 9th revision; INR, international normalized ratio; LDL, low density lipoprotein; MELD, model for end stage liver disease; NMEDW, Northwestern Medicine Enterprise Data Warehouse; OPTN, Organ Procurement and Transplantation Network; RI, resistive index; RRT, renal replacement therapy; STAR, standard transplant analysis research files; SBP, spontaneous bacterial peritonitis; TEG, thromboelastogram; TIA, transient ischemic attack; TIPS, transjugular intrahepatic portosystemic shunt

\*All codes and columns combined with "OR" term

\*\*denotes variable that was significant in age, race and gender adjusted univariate analysis prior to model building

\*\*\*Smoking status was assessed using natural language processing, which is a technique that converts free text information relevant to smoking status that is commonly found in clinical documentation into a structured form that can be readily processed and analyzed, as described previously<sup>13</sup>

**Supplemental Table 3. Demographic and Clinical Characteristics of First Liver Transplant Recipients at Northwestern Medicine Compared to the National Sample (OPTN, 2002-2011)**

| Characteristic                           | OPTN<br>N=58,608 | NMEDW<br>N=1024 | P value <sup>^</sup> |
|------------------------------------------|------------------|-----------------|----------------------|
| Age, years, mean ± SD                    | 53.4 ± 10.1      | 56.3 ± 9.7      | <0.0001              |
| <45, %                                   | 15.0             | 11.1            |                      |
| 45-49                                    | 13.4             | 10.6            |                      |
| 50-54                                    | 21.4             | 19.3            |                      |
| 55-59                                    | 22.6             | 21.7            |                      |
| 60-64                                    | 16.0             | 18.2            |                      |
| 65+                                      | 11.6             | 19.1            |                      |
| Sex (men), %                             | 67.1             | 65.9            | 0.42                 |
| Recipient race & ethnicity, %            |                  |                 | 0.0001               |
| Non-Hispanic White                       | 72.4             | 78.6            |                      |
| Non-Hispanic Black                       | 9.2              | 6.9             |                      |
| Hispanic                                 | 12.8             | 10.9            |                      |
| Asian                                    | 4.5              | 3.1             |                      |
| Other                                    | 1.1              | 0.4             |                      |
| Socioeconomic Status, %                  |                  |                 |                      |
| College education                        | 47.4             | 64.1            | <0.0001              |
| Working for income at time of transplant | 24.3             | 16.9            | <0.0001              |
| Primary Payer, %                         |                  |                 | NA                   |
| Private                                  |                  | 40.9            |                      |
| Medicare                                 | Not available    | 48.9            |                      |
| Medicaid                                 |                  | 7.5             |                      |
| Other                                    |                  | 2.6             |                      |
| Hospitalization status at transplant, %  |                  |                 | <0.0001              |
| Not hospitalized                         | 70.6             | 69.5            |                      |
| Hospitalized not in ICU                  | 17.7             | 23.1            |                      |
| In ICU                                   | 11.8             | 7.4             |                      |

**Supplemental Table 3 continued.**

| <b>Characteristic</b>                        | <b>OPTN<br/>N=58,608</b> | <b>NMEDW<br/>N=1024</b> | <b>P value<sup>^</sup></b> |
|----------------------------------------------|--------------------------|-------------------------|----------------------------|
| Recipient functional status at transplant, % |                          |                         | 0.26                       |
| Independent                                  | 47.0                     | 45.9                    |                            |
| Partially dependent                          | 25.9                     | 22.6                    |                            |
| Totally dependent                            | 27.2                     | 27.1                    |                            |
| Calculated MELD score at LT, mean $\pm$ SD   | 21.1 $\pm$ 10.1          | 20.9 $\pm$ 11.6         | 0.63                       |
| Waitlist time, days, mean $\pm$ SD           | 263.9 $\pm$ 485.8        | 370.9 $\pm$ 694.3       | <0.0001                    |
| Cause of ESLD, %                             |                          |                         | <0.0001                    |
| Hepatitis C                                  | 37.8                     | 33.5                    |                            |
| Alcohol                                      | 13.8                     | 23.5                    |                            |
| NASH                                         | 5.1                      | 6.5                     |                            |
| Other                                        | 19.5                     | 26.9                    |                            |
| Unknown                                      | 2.1                      | 9.6                     |                            |
| Hepatocellular Carcinoma, %                  | 28.6                     | 40.1                    | <0.0001                    |
| Complications of ESLD at LT, No (%)          |                          |                         |                            |
| Hepatic Encephalopathy                       | 77.9                     | 95.8                    | <0.0001                    |
| Ascites at transplant                        | 79.0                     | 76.4                    | 0.04                       |
| Spontaneous bacterial peritonitis            | 7.9                      | 19.5                    | <0.0001                    |
| Variceal Bleed                               | 2.4*                     | 24.9                    | NA                         |
| Hepatorenal syndrome                         | Not available            | 22.1                    | NA                         |
| Hyponatremia                                 | 12.0                     | 17.2                    | <0.0001                    |
| TIPS                                         | 10.0                     | 15.9                    | <0.0001                    |
| Portal Vein Thrombosis                       | 6.5                      | 9.5                     | <0.0001                    |
| Hepatopulmonary syndrome                     | Not available            | 0.4                     | NA                         |

**Supplemental Table 3 continued.**

| <b>Characteristic</b>                       | <b>OPTN<br/>N=58,608</b> | <b>NMEDW<br/>N=1024</b> | <b>P value<sup>^</sup></b> |
|---------------------------------------------|--------------------------|-------------------------|----------------------------|
| <b>CVD comorbidities present at LT, %</b>   |                          |                         |                            |
| Ischemic heart Disease                      | 1.5                      | 6.5                     | <0.0001                    |
| Myocardial infarction                       | Not available            | 2.7                     | NA                         |
| Prior revascularization                     | Not available            | 4.4                     | NA                         |
| Prior CABG                                  | Not available            | 0.98                    | NA                         |
| Any dysrhythmia                             | Not available            | 3.1                     | NA                         |
| Atrial Fibrillation                         | Not available            | 6.1                     | NA                         |
| Hypertension                                | 7.9**                    | 59.3                    | NA                         |
| Peripheral Vascular Disease                 | 0.40                     | 1.1                     | 0.0007                     |
| Hyperlipidemia                              | Not available            | 16.3                    | NA                         |
| Heart failure                               | Not available            | 14.9                    | NA                         |
| Cerebrovascular disease                     | 2.25                     | 6.2                     | 0.11                       |
| <b>Other comorbidities present at LT, %</b> |                          |                         |                            |
| Diabetes                                    | 29.0                     | 32.5                    | 0.06                       |
| COPD                                        | 0.6                      | 12.9                    | <0.0001                    |
| Venous thromboembolism, any                 | Not available            | 8.3                     | NA                         |
| Deep venous thrombosis                      | Not available            | 2.7                     | NA                         |
| Pulmonary Embolism                          | 0.11                     | 0.98                    | <0.0001                    |
| Respiratory failure on ventilator           | 6.0                      | 9.6                     | <0.0001                    |
| Chronic kidney disease                      | Not available            | 34.1                    | NA                         |
| Renal Failure requiring RRT                 | 10.7                     | 17.3                    | <0.0001                    |
| Connective tissue disease                   | Not available            | 2.7                     | NA                         |
| Dementia                                    | Not available            | 0.2                     | NA                         |
| Obstructive sleep apnea                     | Not available            | 3.5                     | NA                         |
| Peptic ulcer disease                        | Not available            | 3.7                     | NA                         |
| Pulmonary hypertension                      | Not available            | 10.6                    | NA                         |

**Supplemental Table 3 continued.**

| <b>Characteristic</b>                                  | <b>OPTN<br/>N=58,608</b> | <b>NMEDW<br/>N=1024</b> | <b>P value<sup>^</sup></b> |
|--------------------------------------------------------|--------------------------|-------------------------|----------------------------|
| Recipient BMI (kg/m <sup>2</sup> ) at transplant, mean | 28.2 ± 5.6               | 29.6 ± 6.9              | <0.0001                    |
| Underweight (BMI < 18 kg/m <sup>2</sup> )              | 1.9                      | 2.1                     |                            |
| Normal weight (BMI 18.1-24.9 kg/m <sup>2</sup> )       | 24.9                     | 24.9                    |                            |
| Overweight (BMI 25-29.9 kg/m <sup>2</sup> )            | 32.4                     | 32.4                    |                            |
| Obese (BMI ≥ 30 kg/m <sup>2</sup> )                    | 40.6                     | 40.6                    |                            |
| Smoking status                                         |                          |                         |                            |
| Former or current                                      | Not available            | 34.0                    | NA                         |
| Never                                                  | Not available            | 66.0                    | NA                         |
| Simultaneous liver-kidney, %                           | 5.7                      | 16.9                    | <0.0001                    |
| Living donor, %                                        | 4.2                      | 15.2                    | <0.0001                    |

Abbreviations: OPTN, Organ Procurement and Transplantation Network; NMEDW, Northwestern Medicine Enterprise Data Warehouse; No, number; ESLD, end-stage liver disease; LT, liver transplant; MELD, model for end-stage liver disease; NA, not applicable; NASH, nonalcoholic steatohepatitis; SD, standard deviation

Obesity defined as BMI ≥ 30 kg/m<sup>2</sup>

Results are presented as mean ± standard deviation or %

<sup>^</sup>Analysis of variance for continuous variables and chi-square or Fischer exact for categorical variables

\*In OPTN, variceal bleeding is defined as bleeding within 2 weeks of transplant. In NMEDW, variceal bleeding is defined as any history of variceal bleeding.

\*\*In OPTN, hypertension is defined as drug treated hypertension. In NMEDW, hypertension is defined as any prior drug treated hypertension.
